# Supplementary material for: Epoxidized 1,4-polymyrcene
Source: Royal Society of Chemistry journal article supplement (doi:10.1039/c9py01783f), 2020-01-01
Supplement: c9py01783f1.pdf [file c9py01783f1.pdf]

# Supporting Information to Epoxidized 1,4-polymyrcene

Aleksandar Matic, Andreas Hess, Dirk Schanzenbach and Helmut Schlaad\*

University of Potsdam, Institute of Chemistry, Karl-Liebknecht-Straße 24-25, 14476 Potsdam, Germany

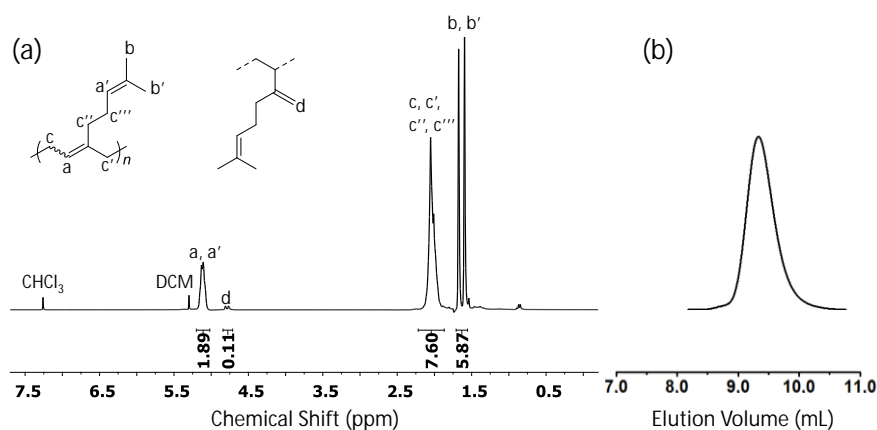

Figure S1. (a)  $^1\text{H}$  NMR (500 MHz,  $\text{CDCl}_3$ ) spectrum and (b) SEC-RI trace (eluent: THF) of the 1,4-polymyrcene sample synthesized by anionic polymerization.

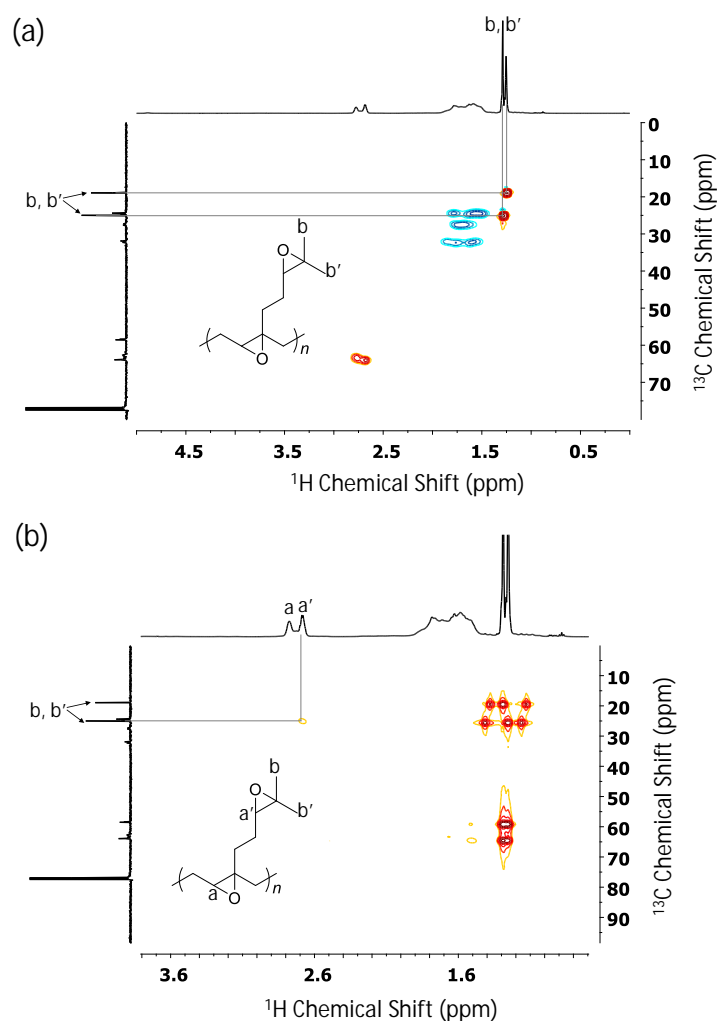

Figure S2. (a)  $^1\text{H}$ ,  $^{13}\text{C}$ -HSQC NMR (500 MHz, 125 MHz) spectrum and (b)  $^1\text{H}$ ,  $^{13}\text{C}$ -HMBC (500 MHz, 125 MHz) spectrum of the 98% epoxidized 1,4-polymyrcene in  $\text{CDCl}_3$ .

(a)

$$\text{Degree of epoxidation} = \frac{\text{Int(B)}}{[\text{Int(A)} + \text{Int(A')}/2 + \text{Int(B)}]}$$

$$\text{Mole fraction of side chain epoxide} = \frac{\text{Int(C)}}{[\text{Int(B)} \times 6]}$$

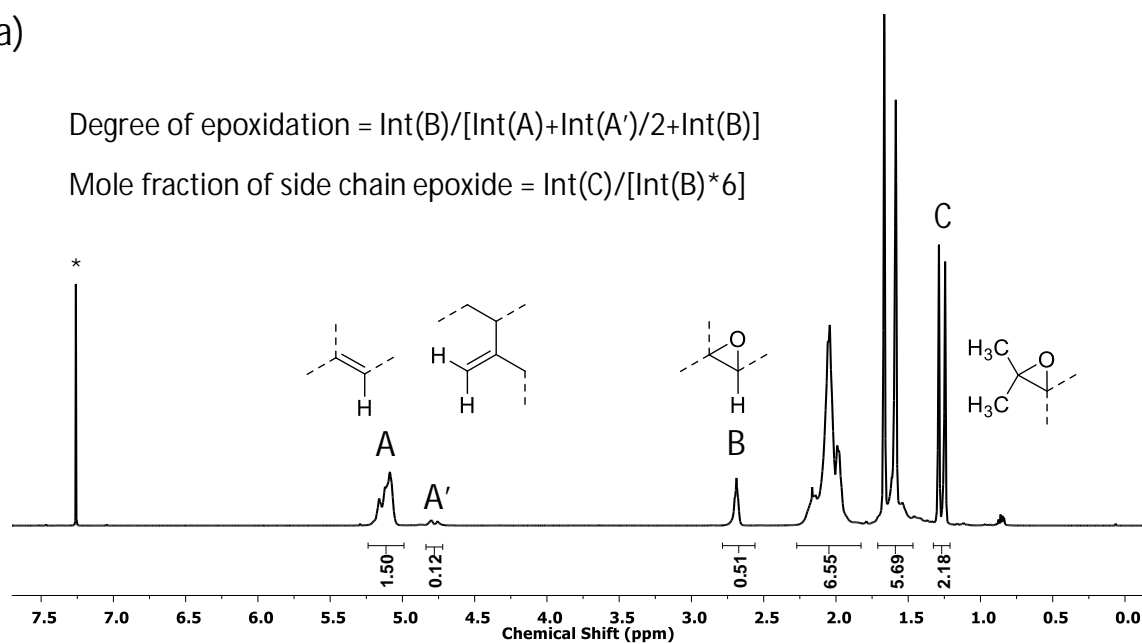

(b)

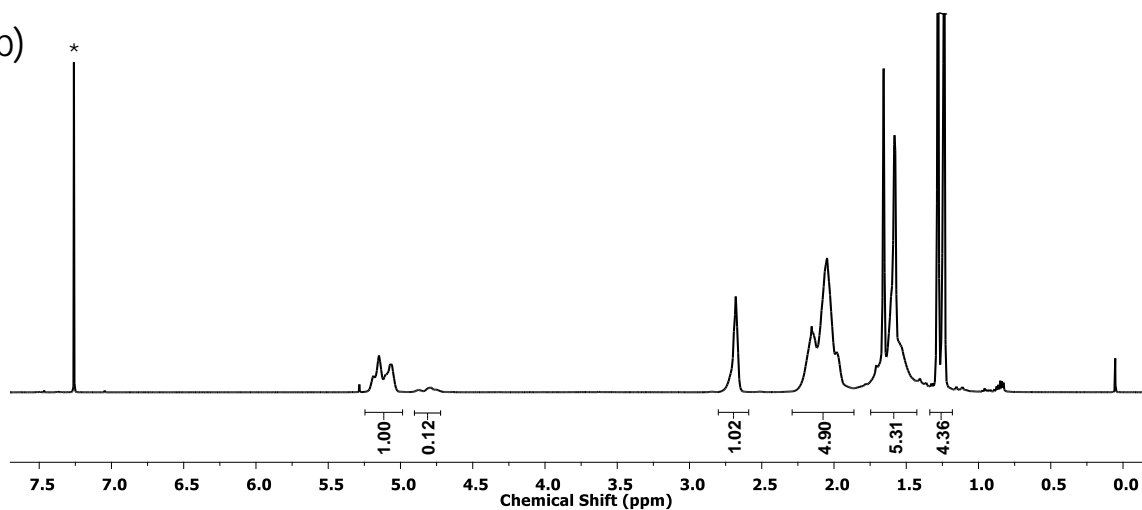

(c)

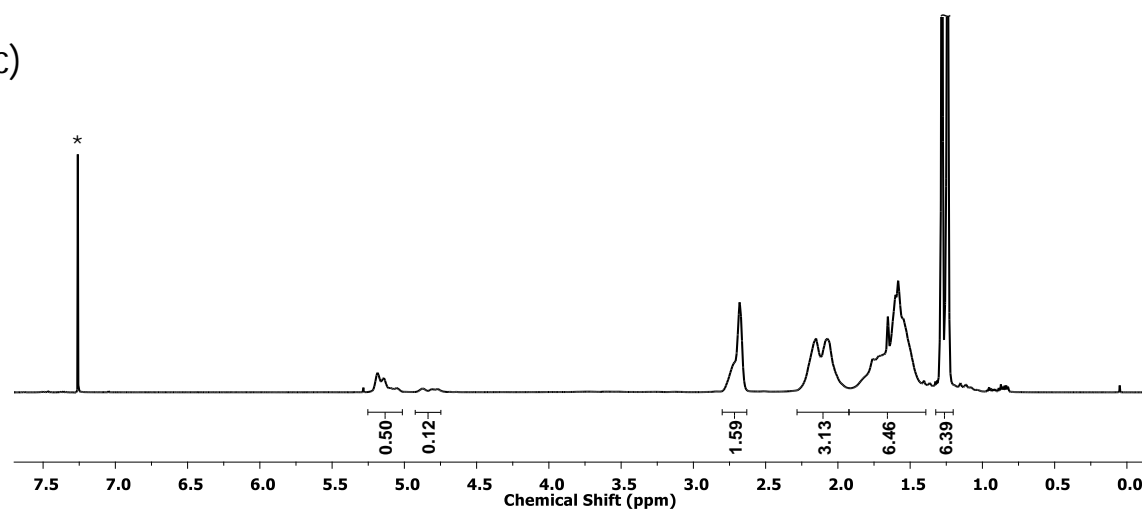

Figure S3 <sup>1</sup>H NMR spectra (500 MHz, CDCl<sub>3</sub>) of the partially epoxidized 1,4-polymyrceins (a) 25%, (b) 49%, and (c) 74% (\* = solvent).

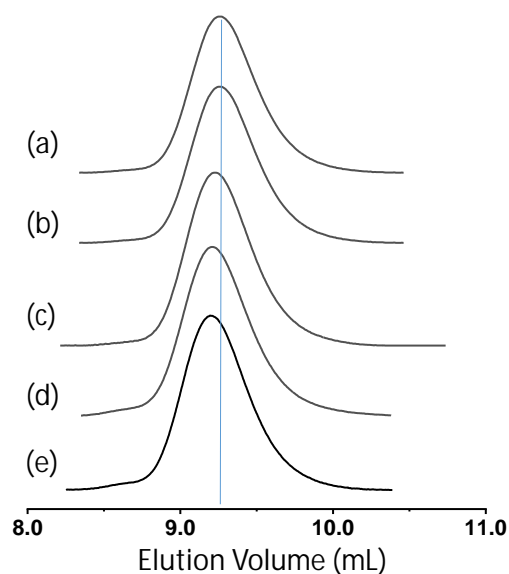

Figure S4. SEC-RI traces (eluent: THF) of (a) 1,4-polymyrcene and epoxidized 1,4-polymyrcenes (b) 25%, (c) 49%, (d) 74%, and (e) 98%.

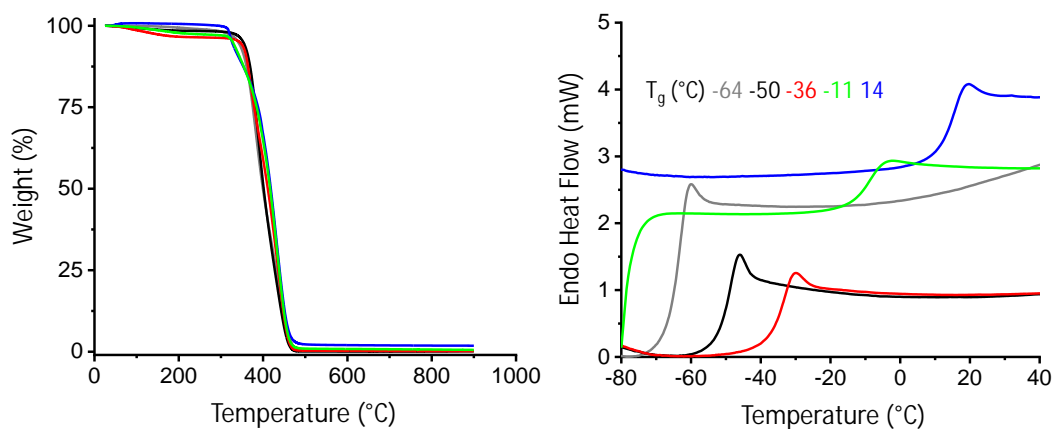

Figure S5. TGA curves (10 K min<sup>-1</sup>, N<sub>2</sub>) (left) and DSC 2<sup>nd</sup> heating curves (10 K min<sup>-1</sup>, N<sub>2</sub>) (right) of 1,4-polymyrcene (grey) and epoxidized 1,4-polymyrcenes 25% (black), 49% (red), 74% (green), and 98% (blue).

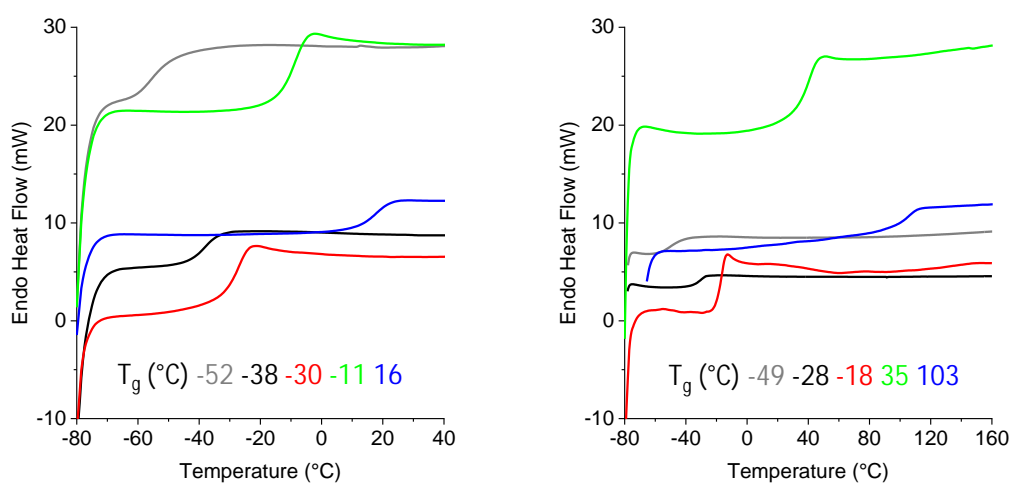

Figure S6. DSC 1<sup>st</sup> heating curves (10 K min<sup>-1</sup>, N<sub>2</sub>) of 1,4-polymyrcene (grey) and epoxidized 1,4-polymyrcenes 25% (black), 49% (red), 74% (green), and 98% (blue) after storage for ~10 months at -20 °C (left) and after annealing at 260 °C for 30 min (right).

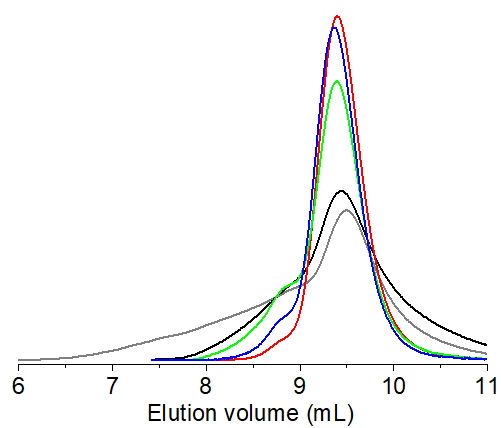

Figure S7. SEC-RI traces (eluent: THF) of 1,4-polymyrcene (grey) and epoxidized 1,4-polymyrcenes 25% (black), 49% (red), 74% (green), and 98% (blue) after storage for ~10 months at -20 °C.
